# Supplementary material for: Quantitative speciation analysis for thein vivostudy of iron metabolism and bioavailability from formula milk fortified with stable isotope enriched iron oxo-hydroxide nanoparticles
Source: Royal Society of Chemistry journal article supplement (doi:10.1039/c8ja00364e), 2019-01-01
Supplement: c8ja00364e1.pdf [file c8ja00364e1.pdf]

## Supplementary material

### Supplementary table 1: Contents of iron ( $\mu\text{g/g}$ ) in rat erythrocytes as bounded to hemoglobin (F2).

Results expressed as mean  $\pm$  standard deviation,  $n = 4$ .

| Group                         | Erythrocytes*                 |
|-------------------------------|-------------------------------|
| G1: non-fortified             | 158 $\pm$ 2                   |
| G2: FeSO <sub>4</sub>         | 104 $\pm$ 43                  |
| G3: <sup>57</sup> Fe(III)-NPs | <sup>nat</sup> Fe: 55 $\pm$ 3 |
|                               | <sup>57</sup> Fe: 76 $\pm$ 16 |

**Supplementary table 2:** Contents of iron ( $\mu\text{g/g}$ ) determined in rat serum as bounded to transferrin (F5). Results expressed as mean  $\pm$  standard deviation, n = 4.

| <b>Group</b>                        | <b>Serum*</b>                      |
|-------------------------------------|------------------------------------|
| <b>G1: non-fortified</b>            | 0.45 $\pm$ 0.02                    |
| <b>G2: FeSO<sub>4</sub></b>         | 0.97 $\pm$ 0.01                    |
| <b>G3: <sup>57</sup>Fe(III)-NPs</b> | <sup>nat</sup> Fe: 0.24 $\pm$ 0.07 |
|                                     | <sup>57</sup> Fe: 0.62 $\pm$ 0.28  |

**Supplementary table 3:** Contents of iron ( $\mu\text{g/g}$ ) determined in rat serum as bounded to ferritin-like species (F1 and F2). Results expressed as mean  $\pm$  standard deviation,  $n = 4$ .

| Group                               | Liver*                        |                                |
|-------------------------------------|-------------------------------|--------------------------------|
|                                     | F1                            | F2                             |
| <b>G1: non-fortified</b>            | $30 \pm 3$                    | $83 \pm 7$                     |
| <b>G2: FeSO<sub>4</sub></b>         | $123 \pm 30$                  | $132 \pm 17$                   |
| <b>G3: <sup>57</sup>Fe(III)-NPs</b> | <sup>nat</sup> Fe: $45 \pm 9$ | <sup>nat</sup> Fe: $70 \pm 15$ |
|                                     | <sup>57</sup> Fe: $117 \pm 5$ | <sup>57</sup> Fe: $84 \pm 3$   |
